# Supplementary material for: RETRACTED ARTICLE: sFRP2 in the aged microenvironment drives melanoma metastasis and therapy resistance
Source: Springer Nature journal article supplement (doi:10.1038/nature17392), 2016-04-01

Figure 2a

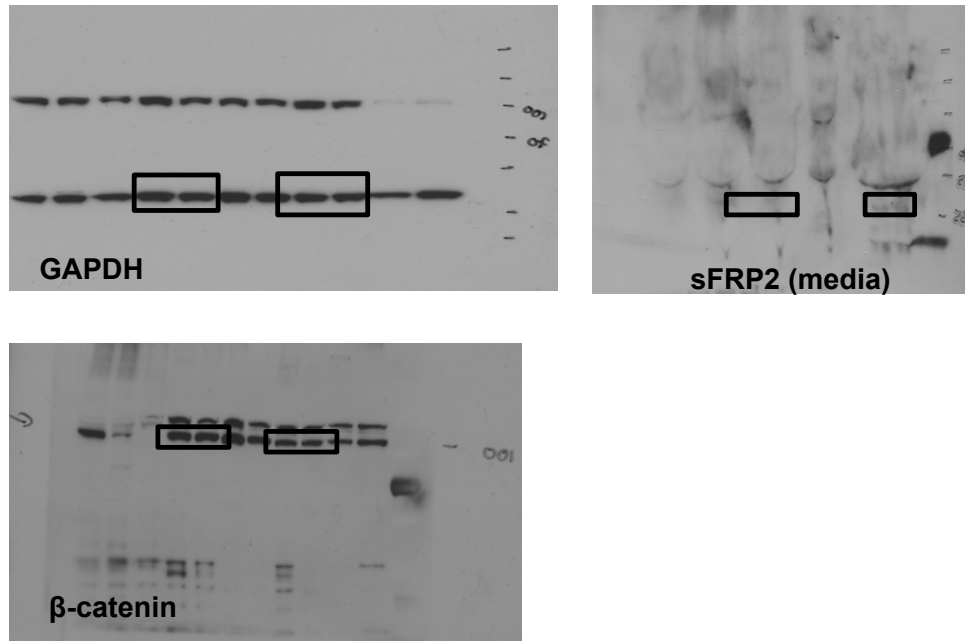

Figure 2g

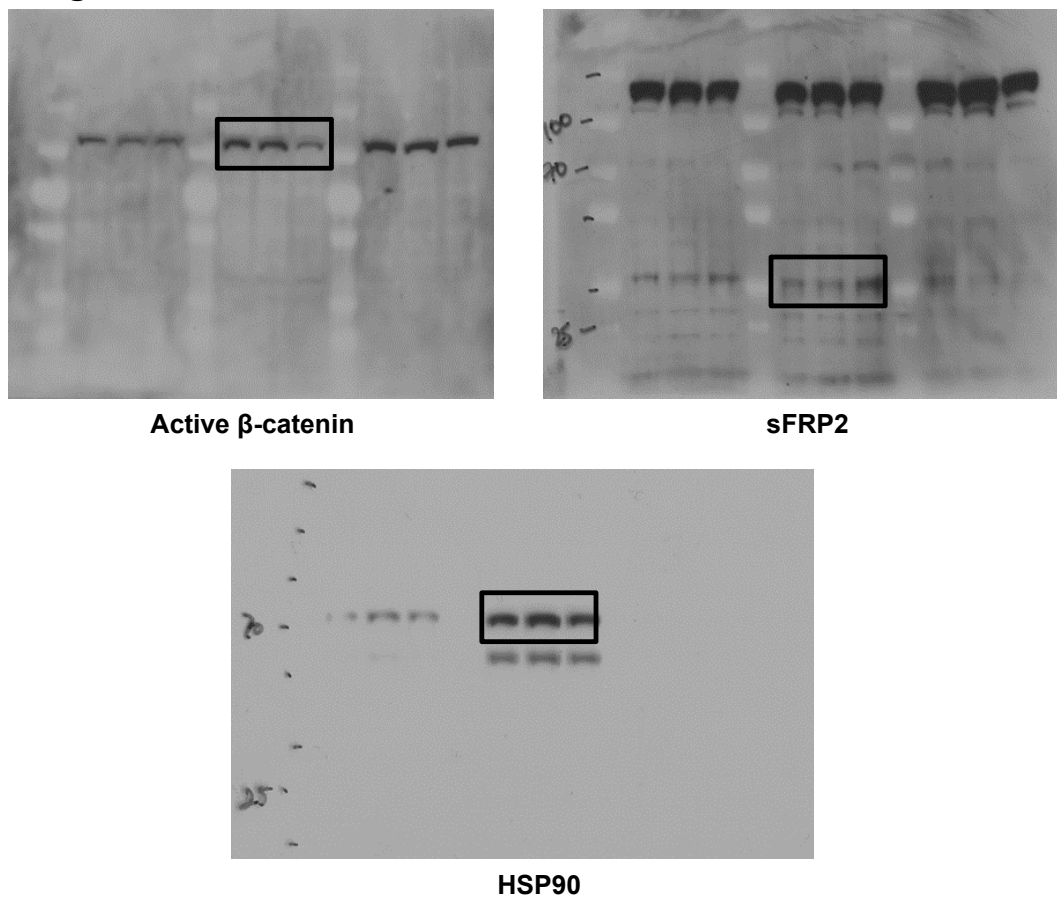

Figure 3a

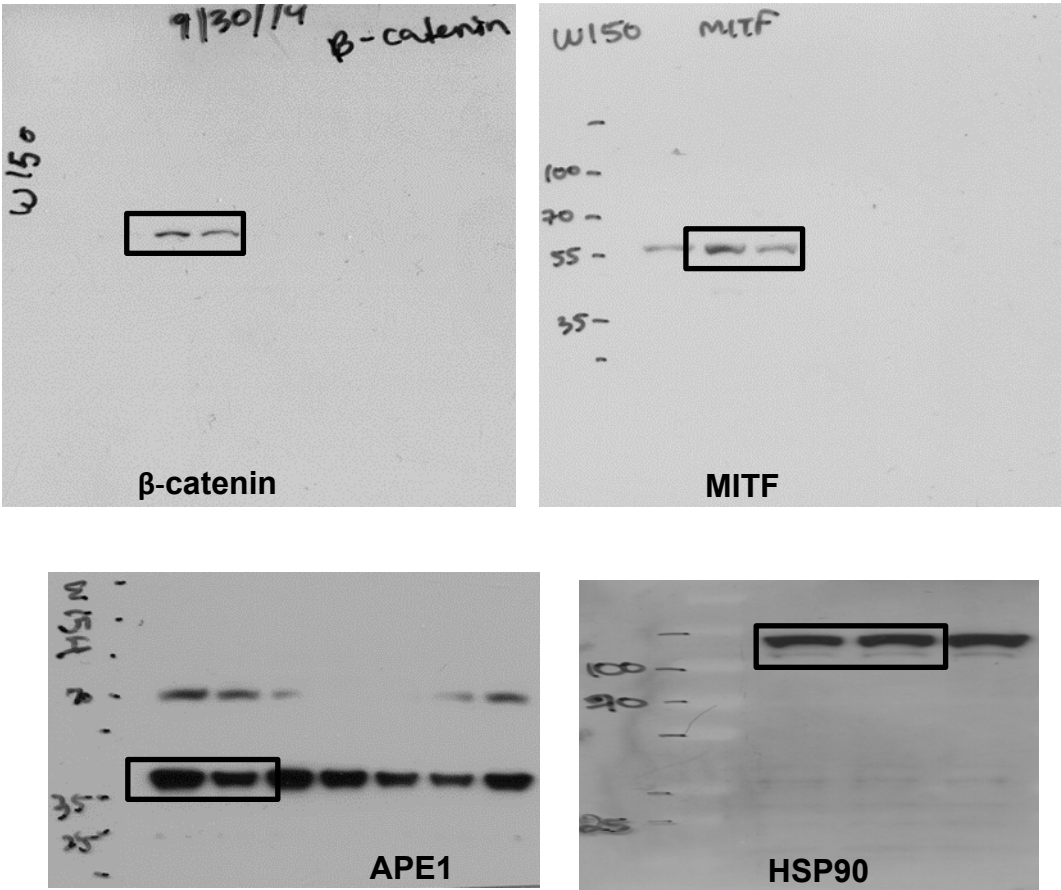

Figure 3e

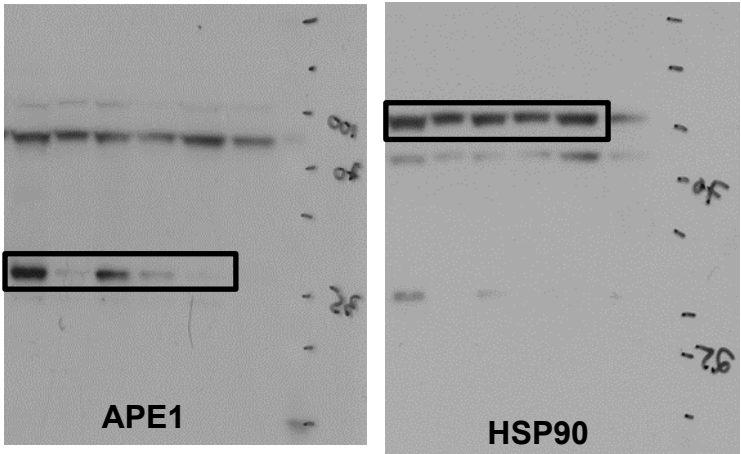

Figure 4f

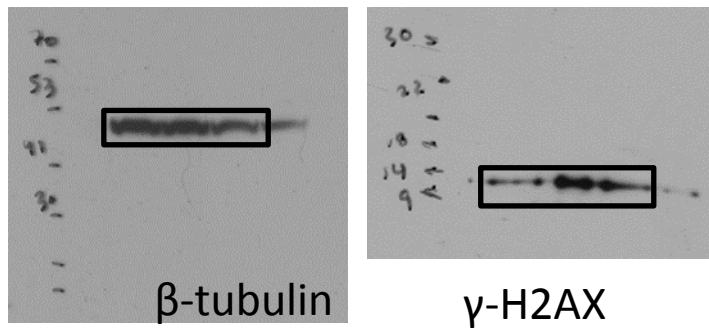

Figure 4g

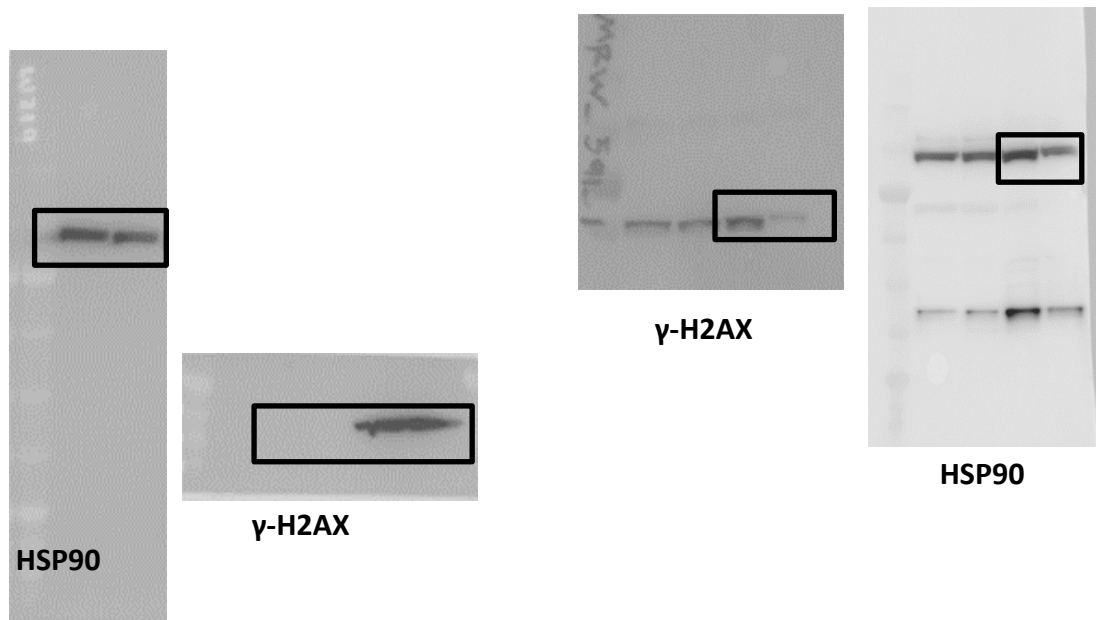

## Extended data 5b

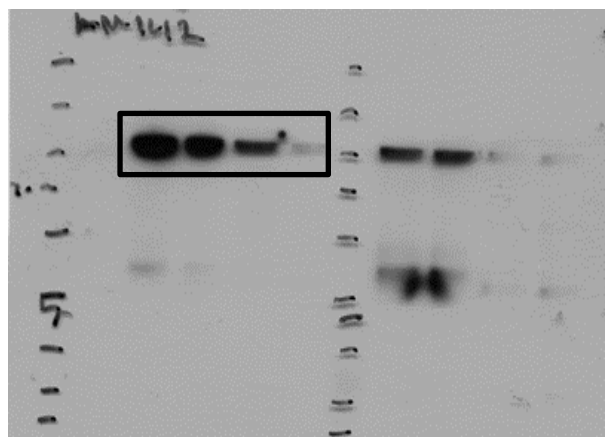

GAPDH

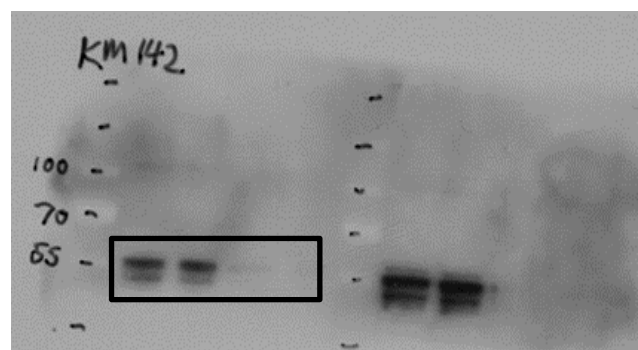

$\beta$ -tubulin

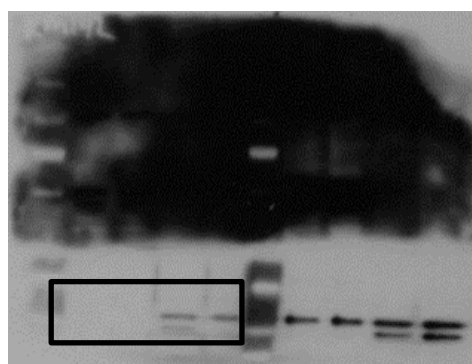

Histone H3

Extended data 6b

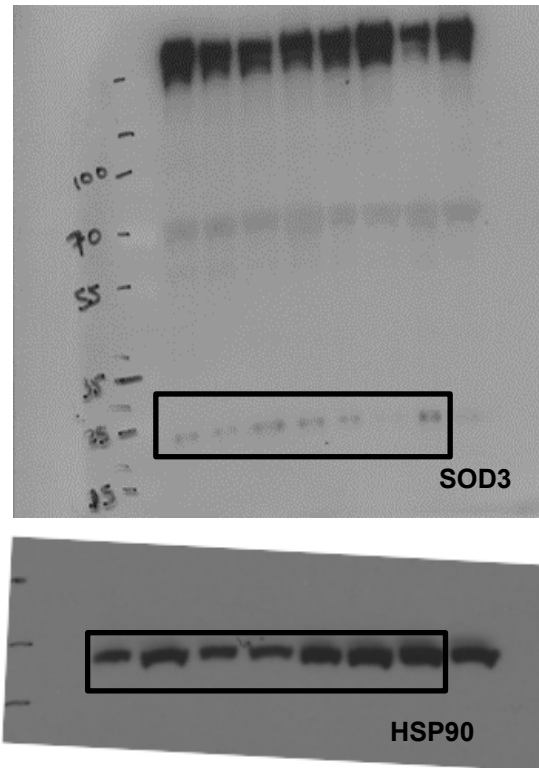

Extended data 6c

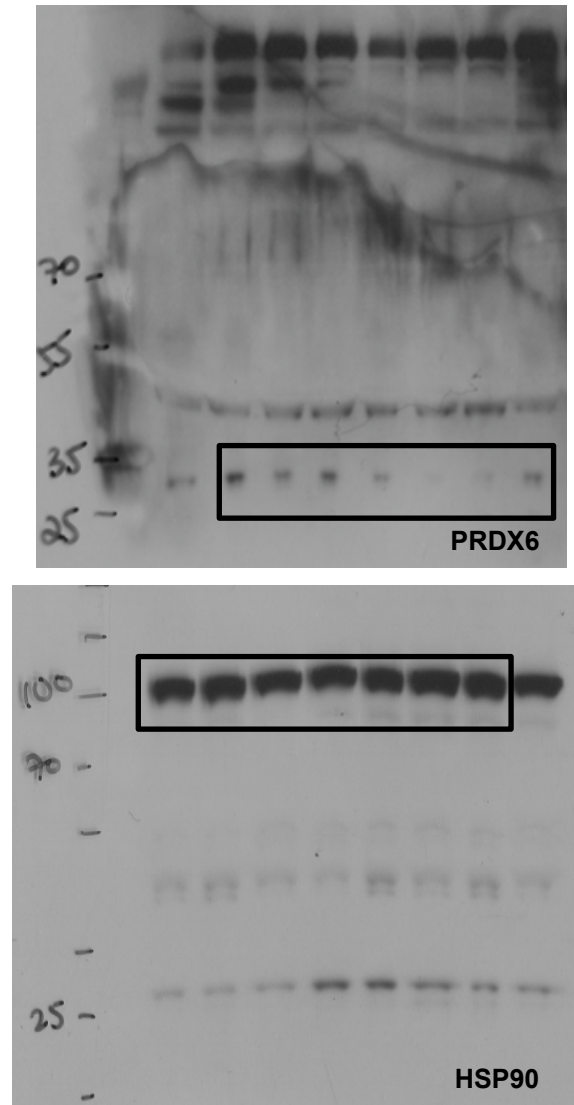

### Extended data 8e

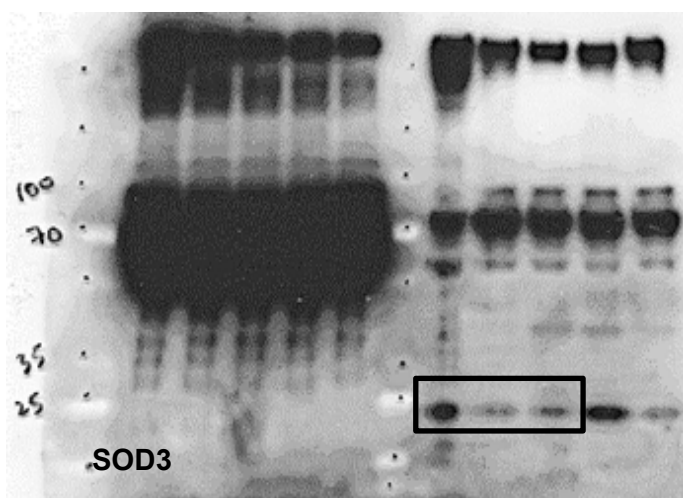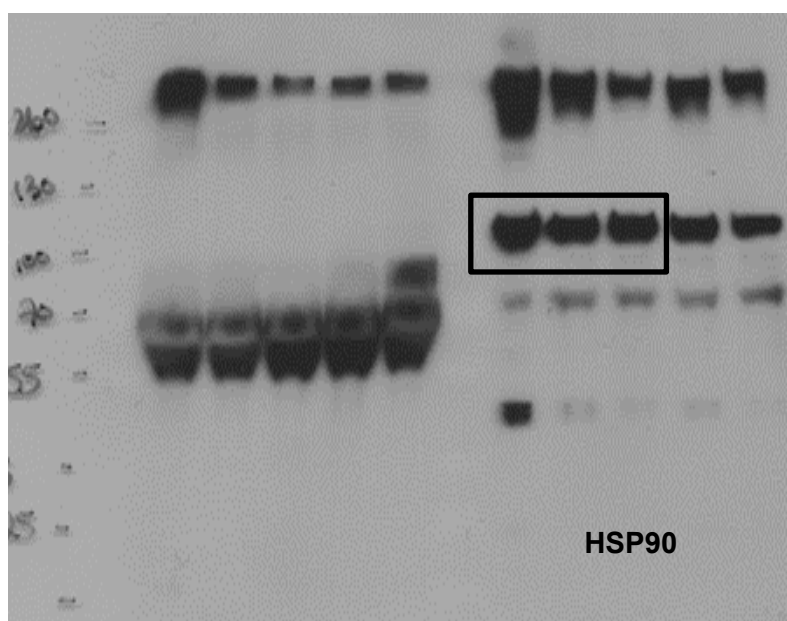



Extended data 10b

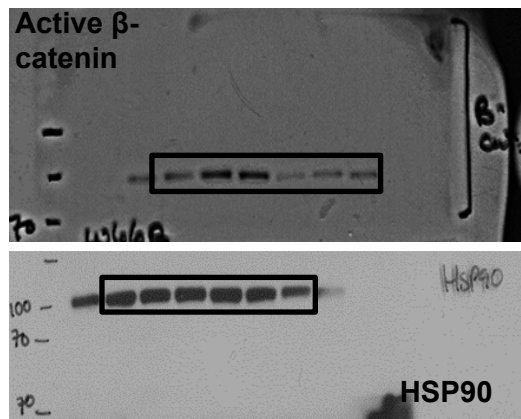

Extended data 10c

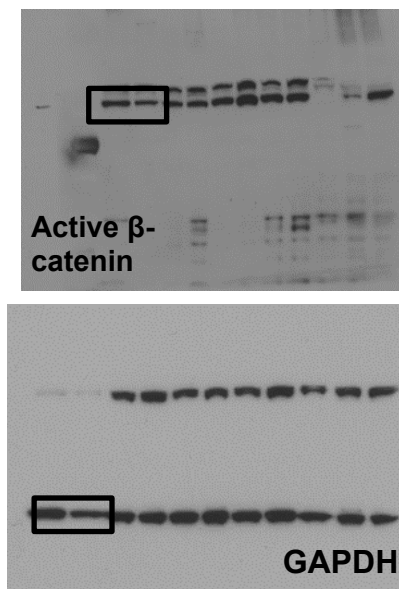

Supplement: 41586_2016_BFnature17392_MOESM43_ESM.pdf [file 41586_2016_BFnature17392_MOESM43_ESM.pdf]
