# Supplementary material for: RETRACTED ARTICLE: sFRP2 in the aged microenvironment drives melanoma metastasis and therapy resistance
Source: Springer Nature journal article supplement (doi:10.1038/nature17392), 2016-04-01
Supplement: 41586_2016_BFnature17392_MOESM44_ESM.pdf [file 41586_2016_BFnature17392_MOESM44_ESM.pdf]

## Primary antibodies

| Antibody         | Catalog no. | Source              | Dilution    |
|------------------|-------------|---------------------|-------------|
| 53BP1            | A300-272A   | Bethyl laboratories | 4 µg/mL     |
| γH2AX            | 05-636      | Millipore           | 10 µg/mL    |
| p21              | 2947S       | Cell signaling      | 0.5 µg/mL   |
| Active β-catenin | 8814S       | Cell signaling      | 0.5 µg/mL   |
| sFRP2 monoclonal | MAB6838     | R&D systems         | 1 µg/mL     |
| sFRP2 polyclonal | ab137560    | Abcam               | 0.96 µg/mL  |
| Ape1             | NB100-101   | Novus Biologicals   | 0.1 µg/mL   |
| MITF             | M3621       | Dako                | 0.625 µg/mL |
| SOD3             | sc-67088    | Santa Cruz          | 0.4 µg/mL   |
| PRDX6            | ab59543     | Abcam               | 1:1000      |
| HSP90            | 4877S       | Cell signaling      | 1:4000      |
| β-tubulin        | 2146S       | Cell Signaling      | 0.5 µg/mL   |
| 8-oxo-dG         | 4354-MC-050 | Trevigen            | 2.5 µg/mL   |
| mCherry          | NBP2-25157  | Novus Biologicals   | 2 µg/mL     |
| CD31             | ab28364     | Abcam               | 1:50        |
| SMA              | ab97375     | Abcam               | 1 µg/mL     |
| Ki67             | VP-RM04     | Vector Labs         | 1:100       |

## shRNA infection

All shRNA was obtained from the TRC shRNA library available through the Molecular Screening Facility at The Wistar Institute. Clones used were:

| Proteins targeted | Clone ID       | Sequence              |
|-------------------|----------------|-----------------------|
| CTNNB1            | TRCN0000003845 | GCTTGGAATGAGACTGCTGAT |
| Ape1              | TRCN0000011214 | GCCGGGTGATTGTGGCTGAAT |
| Ape1              | TRCN0000007958 | CAGAGAAATCTGCATTCTATT |
| Ape1              | TRCN0000007959 | GCCTGGACTCTCTCATCAATA |
| Ape1              | TRCN0000007960 | CCACTCTCTGTTACCTGCATT |
| Ape1              | TRCN0000007961 | CCTGGATTAAGAAGAAAGGAT |
| SOD3              | TRCN0000049073 | GTCGTCCTCTTCCGGCAGCTT |
| SOD3              | TRCN0000049074 | GATCCGAGACATGTACGCCAA |

**Patient data.**

Patient samples and data were collected under IRB approval at the various institutions and provided to the Wistar as de-identified patient samples (sections of paraffin embedded tissue, serum) or patient data. De-identified patient samples and data were collected under IRB exemption approval for protocol #EX21205258-1. Statistics were performed on the following patients, as described in the next section.

| Age | Gender | Response | RECIST  | Hospital of Origin |
|-----|--------|----------|---------|--------------------|
| 66  | M      | PD       | -12.82  | Essen              |
| 71  | F      | SD       | 13.43   | Essen              |
| 70  | F      | PR       | -42.57  | Essen              |
| 71  | M      | SD       | -11.49  | Essen              |
| 68  | M      | PR       | -58.13  | Essen              |
| 44  | F      | PR       | -72.73  | Essen              |
| 45  | M      | PR       | -33.60  | Essen              |
| 49  | F      | PR       | -52.94  | Essen              |
| 56  | F      | SD       | -2.17   | Essen              |
| 24  | F      | PD       | 32.14   | Essen              |
| 56  | M      | SD       | -12.12  | Essen              |
| 31  | M      | PR       | -32.43  | Essen              |
| 58  | M      | PD       | 4.00    | Essen              |
| 47  | F      | PR       | -55.56  | Essen              |
| 79  | M      | CR       | -100.00 | Essen              |
| 43  | M      | PR       | -36.04  | Essen              |
| 27  | M      | PR       | -50.00  | Essen              |
| 60  | M      | PD       | -50.00  | Essen              |
| 69  | M      | PR       | -76.47  | Essen              |
| 29  | F      | PD       | 0.00    | Essen              |
| 67  | M      | PD       | 92.31   | Essen              |
| 78  | F      | PD       | 48.15   | Essen              |
| 68  | M      | SD       | 17.50   | Essen              |
| 47  | M      | PR       | -33.33  | Essen              |
| 61  | M      | PR       | -48.33  | Essen              |
| 77  | M      | SD       | 1.96    | Essen              |
| 75  | M      | PR       | -38.46  | Essen              |
| 50  | F      | PR       | -57.14  | Essen              |
| 70  | F      | PD       | -8.16   | Essen              |
| 43  | M      | PD       | 20.00   | Essen              |
| 78  | M      | SD       | -16.00  | Essen              |
| 66  | M      | PD       | 19.64   | Essen              |
| 77  | M      | SD       | -11.11  | Essen              |
| 58  | M      | PR       | -50.00  | Essen              |

|    |   |    |         |                 |
|----|---|----|---------|-----------------|
| 45 | M | PR | -33.33  | Essen           |
| 80 | M | PR | -58.00  | UCLA/Vanderbilt |
| 66 | M | PR | -68.00  | UCLA/Vanderbilt |
| 53 | F | PR | -48.00  | UCLA/Vanderbilt |
| 84 | M | SD | -10.00  | UCLA/Vanderbilt |
| 52 | F | PR | -54.00  | UCLA/Vanderbilt |
| 65 | M | SD | -17.00  | UCLA/Vanderbilt |
| 45 | M | PR | -93.60  | UCLA/Vanderbilt |
| 50 | F | PR | -69.00  | UCLA/Vanderbilt |
| 52 | M | PR | -40.00  | UCLA/Vanderbilt |
| 30 | M | SD | -14.00  | UCLA/Vanderbilt |
| 29 | M | CR | -100.00 | UCLA/Vanderbilt |
| 46 | F | PR | -31.00  | UCLA/Vanderbilt |
| 59 | M | PR | -64.00  | UCLA/Vanderbilt |
| 83 | M | SD | 5.00    | UCLA/Vanderbilt |
| 62 | M | PR | -47.00  | UCLA/Vanderbilt |
| 69 | F | PR | -70.00  | UCLA/Vanderbilt |
| 60 | M | PR | -57.00  | UCLA/Vanderbilt |
| 34 | . | PR | -100.00 | MIA             |
| 75 | . | SD | -23.00  | MIA             |
| 50 | . | CR | -100.00 | MIA             |
| 50 | . | PR | -69.00  | MIA             |
| 70 | . | PR | -72.80  | MIA             |
| 48 | . | SD | -67.00  | MIA             |
| 65 | . | SD | -25.00  | MIA             |
| 78 | . | SD | -17.30  | MIA             |
| 83 | . | PR | -38.00  | MIA             |
| 49 | . | PR | -48.80  | MIA             |
| 65 | . | SD | -17.00  | MIA             |
| 67 | . | PR | -44.00  | MIA             |
| 62 | . | PR | -59.00  | MIA             |
| 53 | . | PR | -48.00  | MIA             |
| 40 | . | PR | -60.00  | MIA             |
| 68 | . | SD | -11.00  | MIA             |
| 39 | . | PR | -57.00  | MIA             |
| 32 | . | PR | -61.00  | MIA             |
| 40 | . | PR | -90.50  | MIA             |
| 72 | . | PR | -63.00  | MIA             |
| 68 | . | PR | -59.00  | MIA             |
| 52 | . | PR | -54.00  | MIA             |
| 76 | . | PR | -32.70  | MIA             |
| 69 | . | PR | -68.00  | MIA             |
| 51 | . | PR | -62.00  | MIA             |
| 40 | . | PR | -31.00  | MIA             |

|    |   |    |        |     |
|----|---|----|--------|-----|
| 70 | . | SD | -25.00 | MIA |
|----|---|----|--------|-----|

### **Statistical Analysis of Patient Data.**

#### **Summary for perct\_response by age\_over65**

| N           | age   | mean      | sd       | se (mean) | p25     | p50    | p75       |
|-------------|-------|-----------|----------|-----------|---------|--------|-----------|
| -----+----- |       |           |          |           |         |        |           |
| ---         |       |           |          |           |         |        |           |
| 47          | <=65  | -47.47846 | 29.23829 | 4.264843  | -62     | -50    | -33.33333 |
| 34          | >65   | -25.61848 | 38.78849 | 6.65217   | -58.125 | -20.15 | -10       |
| -----+----- |       |           |          |           |         |        |           |
| ---         |       |           |          |           |         |        |           |
| 81          | Total | -38.30266 | 35.07168 | 3.896853  | -60     | -44    | -16       |
| -----+----- |       |           |          |           |         |        |           |
| ---         |       |           |          |           |         |        |           |

#### **Two-sample Wilcoxon rank-sum (Mann-Whitney) test**

| age         | obs | rank sum | expected |
|-------------|-----|----------|----------|
| -----+----- |     |          |          |
| <=65        | 47  | 1665.5   | 1927     |
| >65         | 34  | 1655.5   | 1394     |
| -----+----- |     |          |          |
| combined    | 81  | 3321     | 3321     |

P = 0.0123

**Spearman correlation between perct\_response and age**

N = 81

Spearman's  $r$  = 0.2408

P = 0.0303
